# 1 Gattaca: Base pair resolution mutation tracking for 2 somatic evolution studies using agent-based models

3 Ryan O Schenck<sup>1,2,\*</sup>, Gabriel Brosula<sup>1</sup>, Jeffrey West<sup>1</sup>, Simon Leedham<sup>2</sup>, Darryl Shibata<sup>3</sup>,  
4 and Alexander RA Anderson<sup>1,\*</sup>

5 <sup>1</sup>H. Lee Moffitt Cancer Center & Research Institute, Integrated Mathematical Oncology, Tampa, 33612, USA

6 <sup>2</sup>University of Oxford, Wellcome Centre for Human Genetics, Oxford, OX37BN, UK

7 <sup>3</sup>University of Southern California, Keck School of Medicine, Department of Pathology, Los Angeles, CA, 90033,  
8 USA

9 \*corresponding authors: Alexander RA Anderson ([Alexander.Anderson@moffitt.org](mailto:Alexander.Anderson@moffitt.org)) and Ryan O Schenck  
10 ([ryan.schenck@univ.ox.ac.uk](mailto:ryan.schenck@univ.ox.ac.uk))

## 11 ABSTRACT

Gattaca provides the first base-pair resolution artificial genomes for tracking somatic mutations within agent based modeling. Through the incorporation of human reference genomes, mutational context, sequence coverage/error information Gattaca is able to realistically provide comparable sequence data for *in-silico* comparative evolution studies with human somatic evolution studies. This user-friendly method, incorporated into each *in-silico* cell, allows us to fully capture somatic mutation spectra and evolution.

## 13 Introduction

14 Recent studies examining histologically normal human and murine tissue has shown that a surprising admixture of somatic  
15 mutations can exist and even expand to a significant clonal area<sup>1-5</sup>. These studies have largely focused on mutation characteri-  
16 zation and have had limited tools to offer explanations for the dynamics driving observed evolutionary trajectories, with only  
17 few notable exceptions. Fewer still have begun incorporating agent based models as a tool to explore somatic evolution in  
18 spatially constrained tissue<sup>5-8</sup>. Historically, genomes within agent based models have been represented as simple counters or as  
19 binary arrays. These studies have lacked the ability to compare, at base pair resolution the mutation spectra or utilize common  
20 tools designed for genotypical data (such as dN/dS). Gattaca is the first to provide a means of tracking base pair resolution  
21 SNVs within an agent based modeling framework. This crucially provides an ability to accurately capture mutation data on a  
22 level comparable to sequencing experiments from the clinic or research settings.

## 23 Implementation

24 Gattaca is provided as an easily executed python script consisting of three parts: initialization, execution, and analysis (Figure  
25 1). After the initial setup Gattaca produces a java file that allows for integration into an agent based model (ABM). The only  
26 pre-requisite for Gattaca is an installation of snpEff<sup>9</sup>, which provides the necessary base pair resolution reference genome and  
27 the tools to access it before Gattaca digests this information for downstream uses.

### 28 Part 1: Initialization

29 The setup resolves user inputs that includes mutation rates, mutation context probabilities, a gene set, and reference genome  
30 choice. Once resolved Gattaca extracts the gene locations from within the users reference genome, a Browser Extensible Data  
31 (BED) file is created that snpEff uses to extract bases for each gene. Gattaca then reads a provided mutational context file, in  
32 the event of none being provided a uniform probability is used. This file represents the probability of observing a mutation  
33 given from the 96 possible mutations within their trinucleotide contexts. Lastly, the mutation rates are scaled to the desired  
34 mean mutation rate. The mutation rates are adjusted from the gene specific mutation rates derived from a pan-cancer study<sup>10</sup>.  
35 This information is then prepared to generate a Gattaca java class tailored for execution within a HAL ABM<sup>11</sup>, although any  
36 ABM framework could be used.

37 The heart of Gattaca is its ability to track mutations within simulations at a base pair resolution. This requires a series of  
38 steps during each cell division where a user checks for mutation. The expected number of mutations per division is given for  
39 each gene ( $g_i$ ) by the product of its individual mutation rate  $\mu_{g_i}$  and its length  $L_{g_i}$ . Within each mutation check during division  
40 a Poisson distribution is used to determine the number of mutations accrued for each gene ( $X_g$ ), so that  $X_g \sim \text{Poisson}(\mu_g * L_g)$ .

41 Determining the specific base that acquires a mutation is based on a multinomial of the 32 possible mutation positions  
42 based on trinucleotide contexts. This is drawn from a multinomial distribution based on the 32 possible positions. Once the  
43 trinucleotide is determined the base mutation is determined using the mutation context probabilities to determine the mutation  
44 type.

### 45 Part 2: Execution

46 Simulations utilizing Gattaca require the two files that are output by the Gattaca initialization step. These files, a java Gattaca  
47 class and a csv file with loci information, will be placed within the scope of your executable HAL model<sup>11</sup>. Details on  
48 using HAL can be found at (<http://halloworld.org>). Once these are added to HAL, the Gattaca class will require  
49 initialization for a founding clone/population. Gattaca ties conveniently into the HAL phylogeny tracker requiring minimal  
50 additional computational overhead. Once Gattaca is initialized a function call to `_RunPossibleMutation` will be required during  
51 each division that will trigger the possibility of mutation upon division as outlined above. A detailed tutorial on integrating  
52 Gattaca and HAL can be found at <https://github.com/MathOnco/Gattaca>.

### 53 Part 3: Analysis

54 Once simulations are complete Gattaca introduces the appropriate noise for each mutation type, one of two ways (adapted  
55 from<sup>12</sup>). The true variant allele frequency (assuming heterozygosity),  $VAF_t$ , is given from  $VAF_t = \frac{N_i}{2N_e}$ , where  $N_i$  is the number  
56 of cells with a given mutation and  $N_e$  is the population size. The user can provide a list of depths for mutations within an  
57 experimental cohort or define a single value *sequencing* depth. If the user sets a single value for depth ( $d$ ) the number of reads  
58 calculated for the depth of a variant,  $D_i$ , is drawn from a Poisson distribution, which yields  $D_i \sim \text{Poisson}(d)$ . If a user provides  
59 a distribution of depths from an experimental cohort Gattaca determines the shape parameters ( $k_c$  and  $p_c$ ) defining a gamma  
60 distribution to obtain  $D_i$  so that  $D_i = \text{Gamma}(k = k_c, p = p_c)$ . The number of reads for a given variant ( $f_i$ ) is finally determined  
61 by  $f_i = B_0(n = D_i, p = VAF_t)$ . By taking the sequenced VAF ( $VAF_s = \frac{f_i}{D_i}$ ) and applying a threshold (typically 0.005 to 0.1  
62 depending on sequencing depth) Gattaca yields mutations that are comparable to what may be observed from sequencing of  
63 tissue.

64 Once the variants are called based on the corrected VAF, variants are annotated with snpEFF and mutational position  
65 information is obtained. The user can output this information as a mutational table for every desired timepoint and every  
66 replicate simulation. As an additional output option users can also export variants from their simulations as a variant call  
67 format (VCF) file. This option allows for easy use in several bioinformatics downstream tools. Lastly, the execution of the  
68 analysis component of Gattaca provides several summary statistics for evolutionary dynamics, such as  $1/f$ <sup>12</sup>, first incomplete  
69 moment<sup>3,13</sup>, an EvoFreq plot<sup>14</sup>, and a crude dN/dS measurement. We note that a true dN/dS would be expected to be the  
70 same across all simulations unless the user implements functional heterogeneity within their simulations based on a single, or  
71 collection of, point mutations.

## 72 Case Study 1: Dimensionality

73 Gattaca allows us to track base pair resolution genomes across any agent based modeling dimension. Recent interest by  
74 ourselves and others in understanding how spatial architecture may affect clonal dynamics and measurements of neutrality  
75 motivates our case study<sup>1,3,6,15,16</sup>.

76 Here we have constructed two simple agent based models (ABM) of cell turnover in three different dimensions, zero- (0D),  
77 two- (2D), and three-dimension (3D), to showcase and compare the mutational profiles and clonal dynamics that Gattaca allows  
78 its users to evaluate. In addition, we perform the simulations for these three dimensions and two model types for three different  
79 total final population sizes to demonstrate the functionalities and outputs of Gattaca (Figure 2). The two model types differ only  
80 in the number of cells that are present at initialization. The fully seeded model initializes by placing an agent with its unique  
81 genome at every lattice point or until the carrying capacity is reached in the 0D case. The second simple ABM is initialized only  
82 with a single cell at a random position within the simulated domain, or simply a population size of one for the 0D case (Figure  
83 2). These two simple model types can be conceptualized as a naive tissue type of model to compare with a stem cell growth  
84 model similar to the idea that cancer originates from a single transformed clone. Here we introduce no functional heterogeneity  
85 across the different genomes that emerge through mutation at each timepoint governed by the conditions set in Gattaca.

86 Within the two models we use the same parameters so as to be able to more accurately compare across the different  
87 dimensions. Each model across all dimensions uses the same birth/death function. The birth rate ( $\lambda$ ,  $\lambda = 0.4$ ) is scaled by the  
88 carrying capacity ( $k$ ) and population size ( $N_T$ ) at every time point of either the domain (e.g. number of lattice points) or as a set  
89 parameter in the 0D case. The equation governing this scaled birth rate ( $\lambda_T$ ) is given by  $\lambda_T = \lambda \frac{k-N_T}{k}$ . If a random number  
90 ( $[0, 1]$ ) is less than the death parameter ( $\rho$ ) plus  $\lambda_T$  a death or birth may happen for a given cell. The probability of a birth event  
91 given an empty lattice position (2D and 3D only) is given by  $P(\text{Birth}) = \rho + \lambda_T$ . If a random number ( $[0, 1]$ ) is less than this  
92 birth event value a cell will die, if not the cell is able to divide.

93 When initializing Gattaca for these simulations an overall mutation rate of  $3.2 * 10^{-9}$  was used and the mutation spectrum  
94 defined was given from a sampled cohort of Large B-Cell Lymphoma whole exome sequencing (this is available in the gattaca  
95 example code). When we analyze these mutation spectrums, post simulation we observe similar distributions of mutation  
96 types across all dimensions and model types consistent with mutation processes expected, based on the Gattaca initialization  
97 (Figure 2 mutation spectrums). The differences that are observed largely depend upon the dimensionality of the model chosen  
98 and the tissue type modeled. In the cases where the domain (or carrying capacity for 0D) is fully seeded we see that the  $1/f$   
99 distributions of variant allele frequencies is similar in the 3D and 2D cases (Figure 2). Contrasting this with the single cell  
100 seeding case we see that the 0D and 3D cases are the most similar while 2D appears to reveal a different distribution (Figure 2).  
101 These results suggest that the modeling dimension is an important consideration for the research question. As expected most of  
102 the clones that are observed are below the detection limits of common methodologies, but can be captured here. The clonal  
103 dynamics, as demonstrated by the EvoFreq plots<sup>14</sup> illustrates that spatially constrained clones competing with one another are  
104 rarely able to expand beyond 10% VAF in the fully seeded cases while several clones reach this size during simulations with  
105 single cell seeding.

## 106 Case Study 2: Wounding

107 Within the first case study we utilized Gattaca across two different types of models and three different dimensions. Next we  
108 wanted to evaluate if wounding within these models would alter the observed clonal dynamics as the spatial constraints for  
109 certain clones is relaxed when cells are removed in a wounding event (Figure 3A). In all simulations, each ABM is seeded by a  
110 single cell. Wounding begins once the thousandth timestep is reached (Figure 3B). After this, wounding occurs at time steps  
111 where the population is greater or equal to 85% of the total possible population (as dictated by the domain size). For the 2D and  
112 3D simulations cells are killed by wounding within a circular and spherical manner, respectively. The number of cells killed  
113 through each wounding event is kept similar by adjusting the radius between 2D and 3D simulations, while in the 0D case, the  
114 number of cells killed is an equivalent number of cells. The same birth/death dynamics and equations used in case study one  
115 are used here, because the probability of birth is modulated by the number of cells (*i.e.* the probability of birth is reduced as the  
116 carrying capacity of the system is reached) a wounding event acts to increase cell divisions where empty sites are present and  
117 thus allows clones to expand into the wounded areas.

118 When we examine the differences between the wounding and non-wounding simulation's cumulative and unique genomes  
119 over time we see a clear signal at the time wounding occurs. At this point, space is open and rapid cell proliferation refills the  
120 areas where the wound occurred (in 0D this results in rapid proliferation back to carrying capacity). As cells divide and mutate  
121 a large number of unique genomes appear over time (Figure 3B). We see that the number of unique genomes in the 0D case  
122 increases drastically faster than those in the 2D and 3D cases, this is due to the mechanism where clones in the 0D case are  
123 chosen at random to be killed while whole or near whole subclonal populations are removed in the 2D and 3D simulations.  
124 Interestingly, when we compare the  $1/f$  distributions through their R-squared values, from linear regression analysis, we see

125 that in the 2D wounding case the relaxation of spatial constraints appears to drive a signal of non-neutral dynamics in a system  
126 that is functionally homogeneous where slight fitness advantages are conferred through room to expand (Figure 3C).

## 127 Conclusions

128 Here we have presented Gattaca, the first base pair resolution mutation tracking *in silico* genome for agent based modeling.  
129 Gattaca provides a powerful tool to track mutations through time and space to compare with patient and murine samples.  
130 We have demonstrated this by comparing the genomes and clonal dynamics that Gattaca provides across different modeling  
131 dimensions and model choices. We then show through a second use case that wounding can show evidence of selection, but  
132 only in the 2D wounding case. This sets an important precedent that modeling choices around dimensionality can significantly  
133 impact the measures of neutrality.

134 Gattaca provides a highly customizable framework that is easily implemented into users agent based simulations for  
135 evaluating somatic evolution in normal or disease tissue. Through the incorporation of common bioinformatics and genotypic  
136 outputs (variant call format files) used frequently in clinical and experimental approaches users can quickly analyze and  
137 compare mutation spectra, burden, heterogeneity, and selection between their samples and *in silico* models.

## 138 Code availability

139 Gattaca is available through GitHub (<https://github.com/MathOnco/Gattaca>). There is a read me available within the GitHub  
140 repository with further instructions on how to utilize Gattaca.

## 141 References

- 142 1. Martincorena, I. *et al.* High burden and pervasive positive selection of somatic mutations in normal human skin. *Science*  
143 **348**, 880–886 (2015).
- 144 2. Lee-Six, H. *et al.* Population dynamics of normal human blood inferred from somatic mutations. *Nature* **561**, 473–478  
145 (2018).
- 146 3. Simons, B. D. Deep sequencing as a probe of normal stem cell fate and preneoplasia in human epidermis. *Proc. Natl.*  
147 *Acad. Sci.* **113**, 128–133 (2016).
- 148 4. Martincorena, I. *et al.* Somatic mutant clones colonize the human esophagus with age. *Science* **362**, 911–917 (2018).
- 149 5. Colom, B. *et al.* Spatial competition shapes the dynamic mutational landscape of normal esophageal epithelium. *Nat.*  
150 *genetics* **52**, 604–614 (2020).
- 151 6. Schenck, R. O. *et al.* How homeostasis limits keratinocyte evolution. *bioRxiv* (2019).
- 152 7. Sottoriva, A. *et al.* A big bang model of human colorectal tumor growth. *Nat. genetics* **47**, 209–216 (2015).
- 153 8. Murai, K. *et al.* Epidermal tissue adapts to restrain progenitors carrying clonal p53 mutations. *Cell stem cell* **23**, 687–699  
154 (2018).
- 155 9. Cingolani, P. *et al.* A program for annotating and predicting the effects of single nucleotide polymorphisms, snpeff: Snps  
156 in the genome of drosophila melanogaster strain w1118; iso-2; iso-3. *Fly* **6**, 80–92 (2012).
- 157 10. Lawrence, M. S. *et al.* Mutational heterogeneity in cancer and the search for new cancer-associated genes. *Nature* **499**,  
158 214–218 (2013).
- 159 11. Bravo, R. R. *et al.* Hybrid automata library: A flexible platform for hybrid modeling with real-time visualization. *PLOS*  
160 *Comput. Biol.* **16**, 1–28 (2020).
- 161 12. Williams, M. J., Werner, B., Barnes, C. P., Graham, T. A. & Sottoriva, A. Identification of neutral tumor evolution across  
162 cancer types. *Nat. Genet.* **48**, 238–244 (2016).
- 163 13. Butler, R. J. & McDonald, J. B. Using incomplete moments to measure inequality. *J. Econom.* **42**, 109–119 (1989).
- 164 14. Gatenbee, C. D., Schenck, R. O., Bravo, R. R. & Anderson, A. R. Evofreq: visualization of the evolutionary frequencies of  
165 sequence and model data. *BMC bioinformatics* **20**, 1–4 (2019).
- 166 15. West, J., Schenck, R. O., Gatenbee, C., Robertson-Tessi, M. & Anderson, A. R. Normal tissue architecture determines the  
167 evolutionary course of cancer. *Nat. communications* **12**, 1–9 (2021).
- 168 16. Noble, R., Burri, D., Kather, J. N. & Beerenwinkel, N. Spatial structure governs the mode of tumour evolution. *bioRxiv*  
169 586735 (2019).



## 170 Acknowledgements

171 ROS is supported by the Wellcome Trust (grant no. 108861/7/15/7) and the Wellcome Centre for Human Genetics (grant no.  
172 203141/7/16/7). ROS and ARAA are supported by the Cancer Systems Biology Consortium grant from the National Cancer  
173 Institute (grant no. U01CA23238) and the Moffitt Cancer Center of Excellence for Evolutionary Therapy. SL is supported by  
174 the Wellcome Trust (grant no. 206314/Z/17/Z). DS is supported by the Cancer Systems Biology Consortium grant from the  
175 National Cancer Institute (grant no. U54CA217376 and grant no. P01 CA196569).

## 176 Author contributions statement

177 RS, DS, and ARAA conceived the idea Gattaca for ABM. Case studies one and two were done by RS and GB with assistance  
178 from JW. The manuscript was written by RS, GB, JW, and ARAA. All authors reviewed the manuscript.

## 179 Competing interests

180 The authors declare no competing interests.

## 181 Figures & Tables

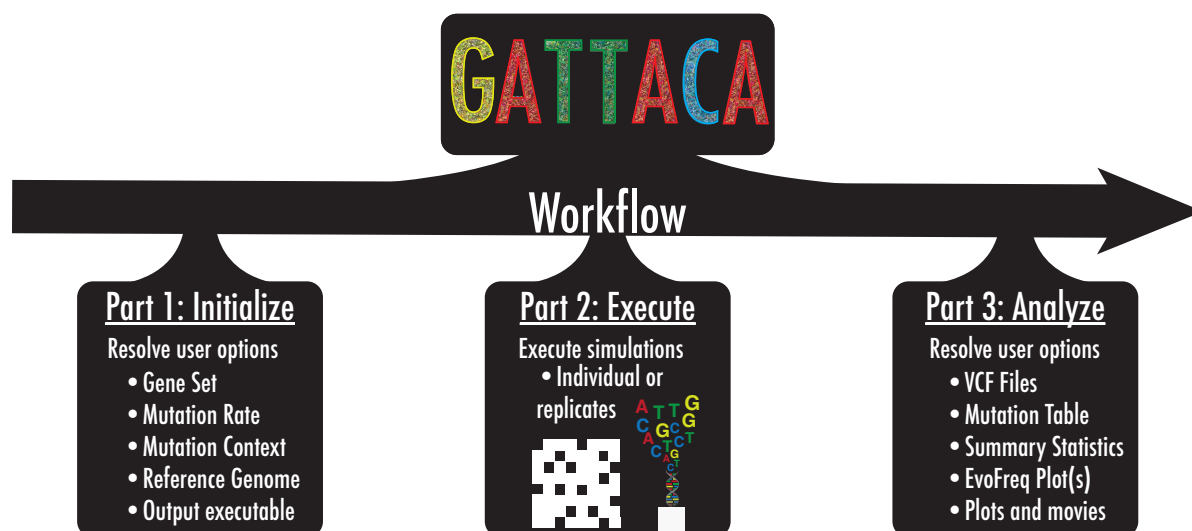

**Figure 1.** Gattaca is a three part workflow for simulating base pair resolution mutations within the human genome for somatic evolution *in silico* studies. Gattaca consists of three parts, (i) user defines options (initialize), (ii) generate a java executable class for *in silico* simulations with base pair resolution mutation tracking (execution), (iii) analyze the output of these simulations for downstream analysis (analyze).

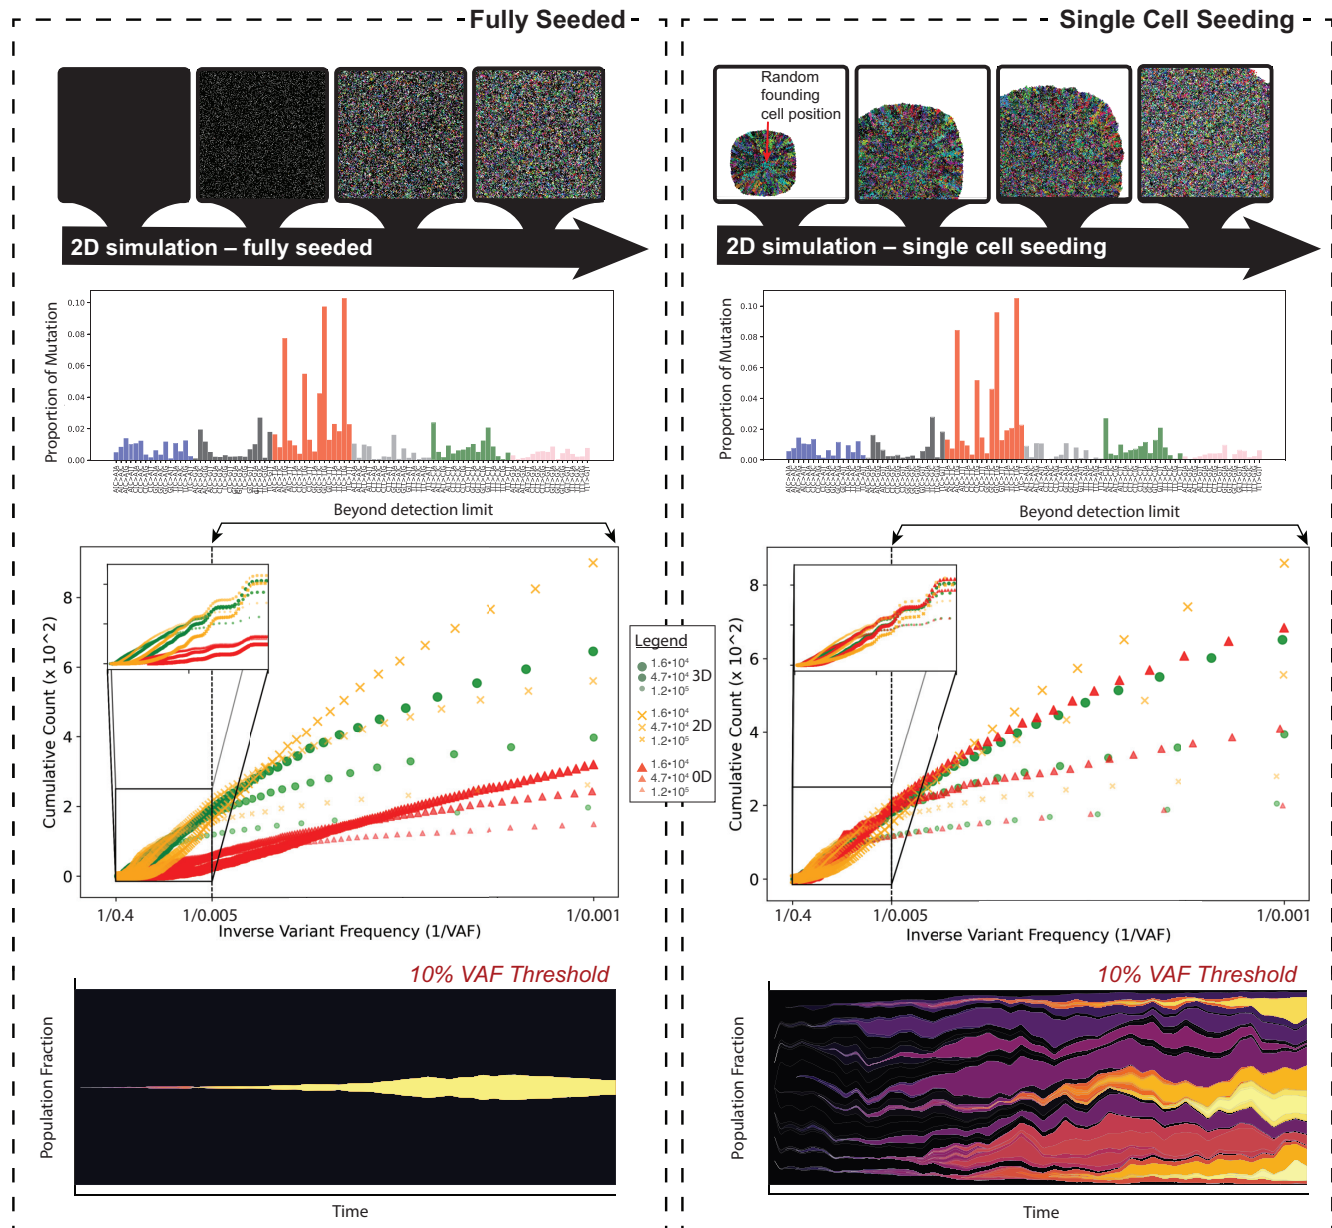

**Figure 2.** Results comparing the fully seeded (*left*) and single cell seeding (*right*) model types and their corresponding mutation profiles and clonal dynamics. For each case, the mutation proportion across the 96 mutation trinucleotides is shown for one of the 2D simulation replicates. The  $1/f$  values for each of the modeled dimensions is shown for three different population sizes, the inset shows the  $1/f$  distribution for that which would be within the limits of detection (a generous 0.005 VAF at high depths). Beneath this, the same 2D replicate that is shown in the mutation spectrum plot is used to highlight the differences in clonal dynamics using an EvoFreq plot with a 10% VAF cutoff between fully seeded and single cell seeding.

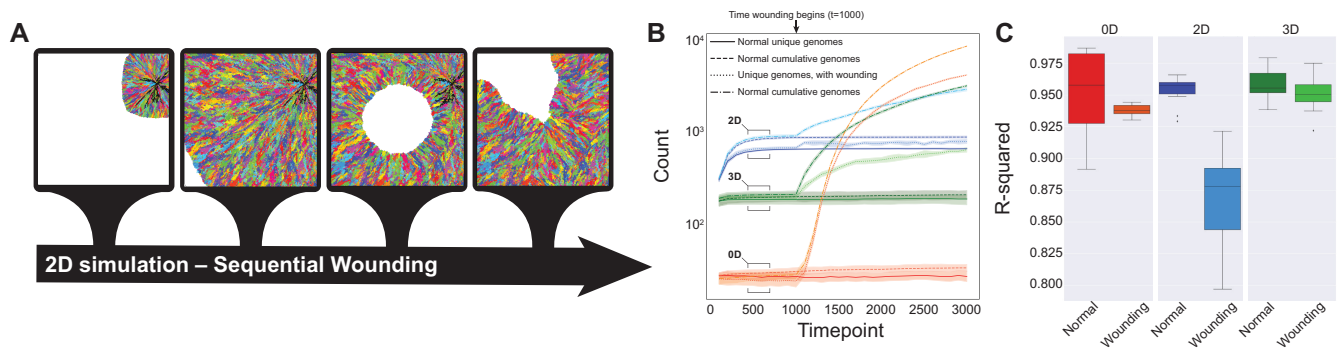

**Figure 3.** Illustration of the repeated wounding of the single cell model in *2D* where colors represent clones that differ by at least one mutation (A). For each of the dimensions the cumulative and unique genomes is given over the course of simulations (B). R-squared values for the linear regression on  $1/f$  distributions for mutations is plotted for all dimensions with and without wounding (C) for all replicate simulations.
